# Supplementary material
Source: PubMed Central journal article supplement (PMC209414)
Supplement: jcinvest_108_10_1513__1.pdf [file jcinvest_108_10_1513__1.pdf]

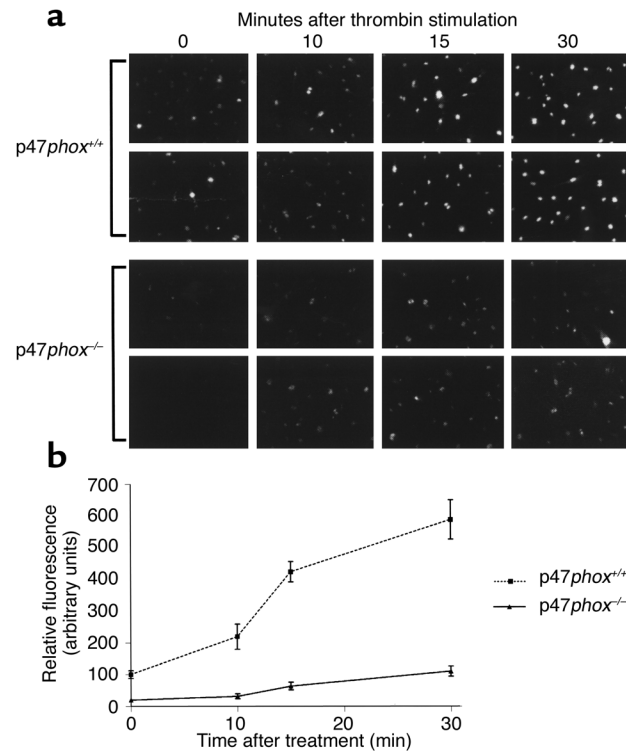

**Figure 1**  
 Detection of  $O_2^-$  by DHE in cultured SMCs. **(a)** SMCs from p47phox<sup>+/+</sup> mice and p47phox<sup>-/-</sup> mice were treated with thrombin for the indicated time periods and incubated with DHE to detect  $O_2^-$ , as described in Methods. Representative panels are shown. **(b)** Fluorescence was quantified as described in Methods from cells treated in quadruplicate, and results are expressed as arbitrary units  $\pm$  SEM.
