# Supplementary material
Source: PubMed Central journal article supplement (PMC209414)
Supplement: jcinvest_108_10_1513_v2_1.pdf [file jcinvest_108_10_1513_v2_1.pdf]

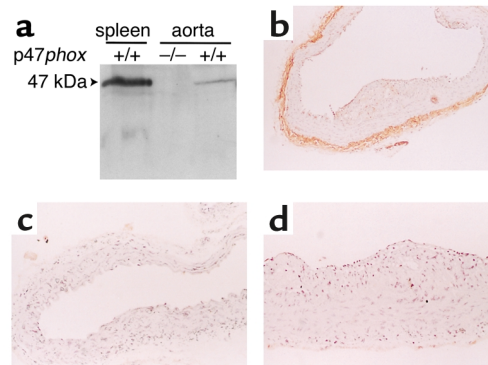

**Figure 2**

Specificity of the polyclonal p47phox antibody. (a) Western blot analysis of tissue lysates from spleen and aorta of p47phox<sup>+/+</sup> and p47phox<sup>-/-</sup> mice. A single 47-kDa band is observed in aortas of wild-type mice only. (b) Immunohistochemical analysis of an aortic section from an ApoE<sup>-/-</sup>/p47phox<sup>+/+</sup> mouse with the anti-p47phox antibody, demonstrating brown staining of p47phox. (c) Similar immunohistochemical analysis of an aortic section from an ApoE<sup>-/-</sup>/p47phox<sup>-/-</sup> mouse that lacks p47phox immunoreactivity. (d) Staining of an aortic section from an ApoE<sup>-/-</sup>/p47phox<sup>+/+</sup> mouse with IgG control.
