# Supplementary material
Source: PubMed Central journal article supplement (PMC209414)
Supplement: jcinvest_108_10_1513_v3_1.pdf [file jcinvest_108_10_1513_v3_1.pdf]

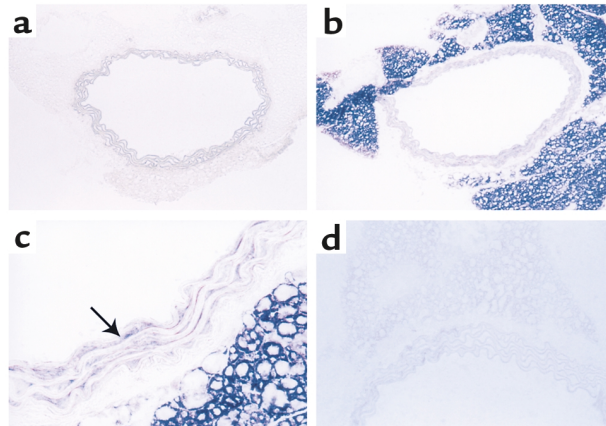

**Figure 3**

Frozen aortic sections contain an intact NADH-dependent oxidase that generates  $O_2^-$ . Aortic sections were incubated with nitroblue tetrazolium, which reacts with  $O_2^-$  to produce insoluble formazan, which is purple. Incubations were performed in the absence (a) or presence (b-d) of NADH (1  $\mu$ M); in d, the tissue was pretreated with the NADH oxidase inhibitor diphenyliodonium (10  $\mu$ M). All sections are magnified 20 times except c, which is magnified 40 times. The arrow in c denotes medial SMCs producing  $O_2^-$ . Intense adventitial production of  $O_2^-$  as noted here has been described previously (21).
